# Supplementary material for: Real-World Clinical Outcomes of Pembrolizumab as Second-Line Therapy for Advanced Urothelial Carcinoma
Source: Research Square preprint supplement (doi:10.21203/rs.3.rs-81346/v1), 2020-11-03
Supplement: Supplementary file 1 [file 3014e15765b9bcc5162ff80c.xlsx]

## Sheet: Sheet1
Table 1 Demographics of the study population
Variable	Median (range) or n (%)
Total number of patients	97
Age, years	73 (48 to 85)
Male/Female	69 (71) / 28 (29)
Current or former smoker/non-smoker	60 (62) / 37 (38)
Primary tumor site, upper urinary tract	42 (43) / 55 (57)
Pure UC in histologic testing	86 (89) / 11 (11)
Surgical treatment	48 (50) / 49 (50)
ECOG PS, 0-1/2-4	78 (80) / 19 (20)
Number of prior regimens, 1/2/3	67 (69) / 27 (28) /3 (3)
Number of prier platinum agent courses	4 (1 to 30)
Metastatic sites, liver/lung/bone/lymph node*	17(18) / 26(27) / 18(19) / 74(76)
Lesions by RECIST evaluation, Yes/No	82 (84) / 15(16)
Number of metastatic organs, 1/2/3/4/5*	22(23) / 43(44) / 21(22) / 7(7) / 4(4)
Time from previous chemotherapy, <3 / >3 months	78 (80) / 19 (20)
Hb (mg/dL)	10.1 (6.6 to 16.1)
CRP (mg/dL), data missing in 2 cases	0.53 (0 to16.6)
NLR, data missing in 2 cases	2.79 (0.75 to 20.5)
Bellumunt risks, 0/1/2/3/4**	10(10) / 37(38) /31(32) / 15(16) / 4(4)
UC, Urinary carcinoma; ECOG PS, Eastern Cooperative Oncology Group Perfromance status; RESIST, Response Evaluation Criteria in Solid Tumor; Hb, Hemoglobin; CRP, C-reactive protein; NLR, neutrophil-lymphocyte ratio.
* The lesions were evluated and reported by doctors in charge.
** Bellumunt risk assesses the number of risk factors present from among worse PS (>1), low Hb (<10 mg/dL), presence of liver metastasis, and short interval from previous chemotherapy (<3 months).
